# Supplementary material
Source: MDPI journal article supplement (https://www.mdpi.com/1424-2818/15/4/498)
Supplement: s1 [file s1]

**Table S1. Primer sequences for microsatellites and cytochrome-*b* region for species identification.**

| Name   | Fluorescent label <sup>1</sup> | Primer sequences (5' to 3')                              |
|--------|--------------------------------|----------------------------------------------------------|
| FH2001 | VIC                            | F – TCCTCCTCTTCTTTCCATTG<br>R – TGAACAGAGTTAAGGATAGACACG |
| FH2010 | PET                            | F – AAATGGAACAGTTGAGCATGC<br>R – CCCCTTACAGCTTCATTTTCC   |
| FH2062 | NED                            | F – GGCTTCTGGAGACAGGCAT<br>R – CAGAACGCTGTCAGCCCTT       |
| FH2096 | FAM                            | F – CCGTCTAAGAGCCTCCCAG<br>R – GACAAGGTTTCCTGGTTCCA      |
| FH2137 | NED                            | F – GCAGTCCCTTATTCCAACATG<br>R – CCCCAAGTTTTGCATCTGTT    |
| FH2140 | PET                            | F – GGGGAAGCCATTTTAAAGC<br>R – TGACCCTCTGGCATCTAGGA      |
| PEZ19  | FAM                            | F – GACTCATGATGTTGTGTATC<br>R – TTTGCTCAGTGCTAAGTCTC     |
| ScatID | none                           | F – TATGCCTGATTCTACAGAT<br>R – TAGTATAGTCCTCGTCC         |

<sup>1</sup>On forward primer

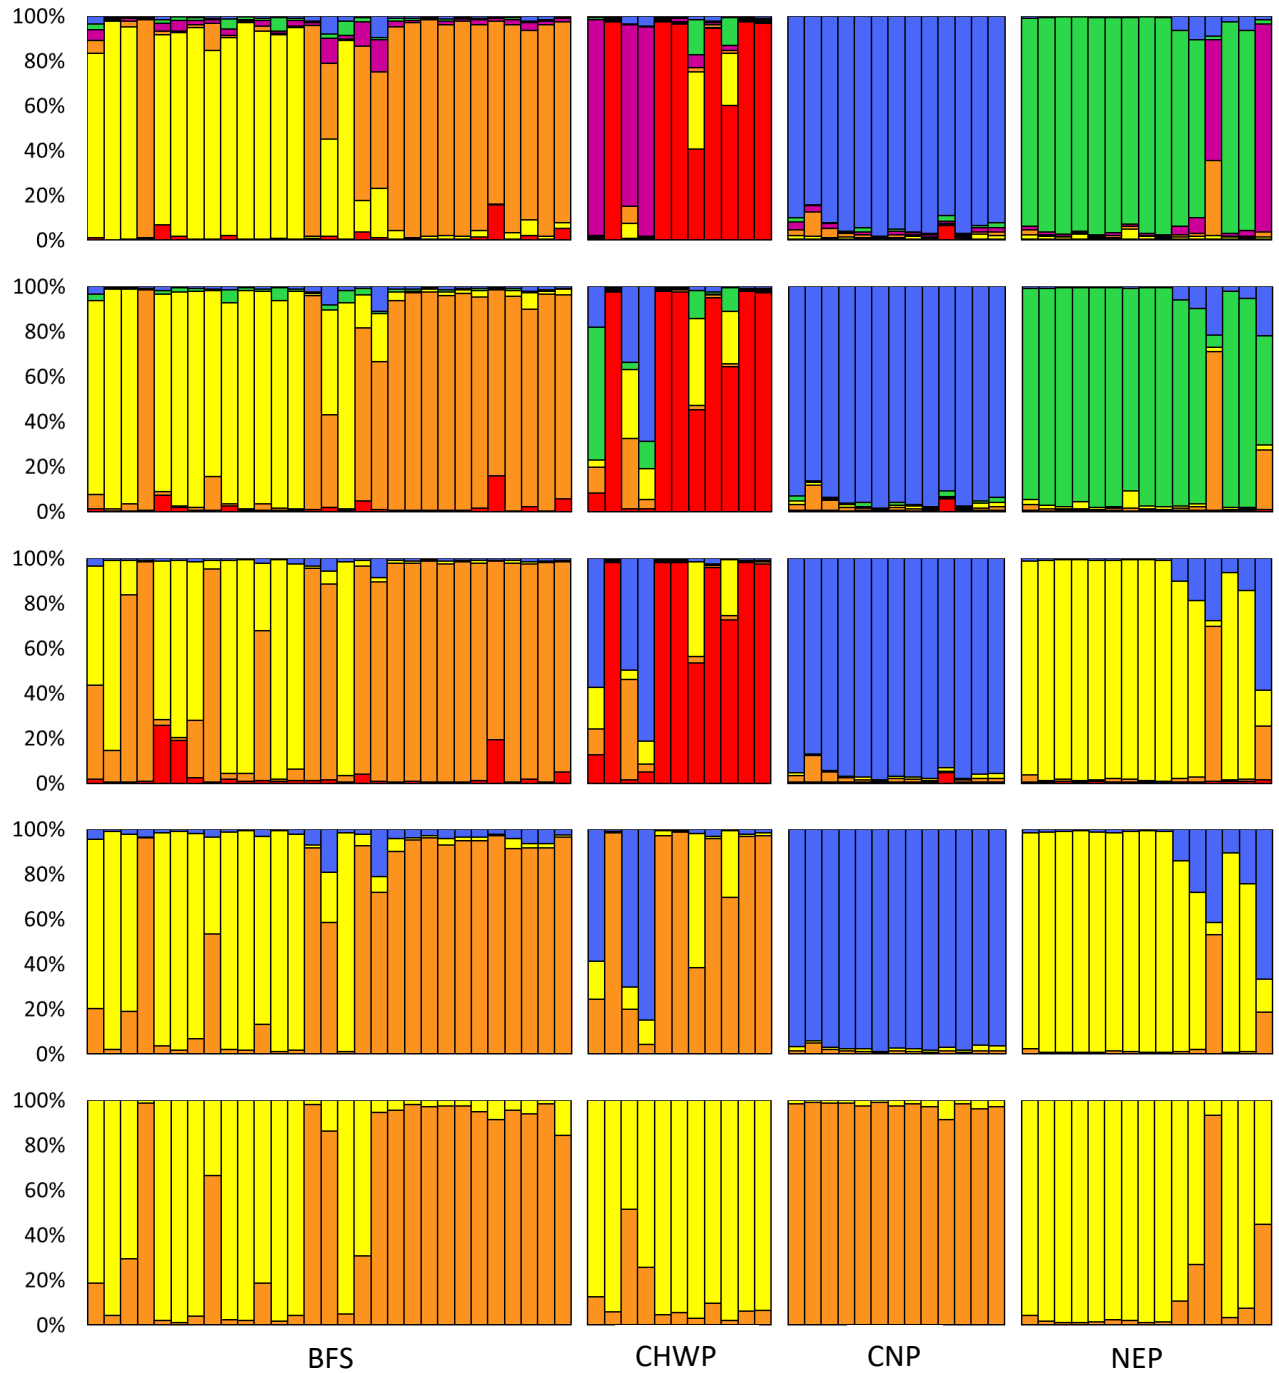

**Figure S1. Genetic assignments from STRUCTURE, showing different levels of  $K$ .** From top to bottom:  $K=6$ ,  $K=5$ ,  $K=4$ ,  $K=3$ , and  $K=2$ . Our best fitting model is  $K=5$  (see Figure 2 in main manuscript). Plots are aligned and averaged across 5 replicates.

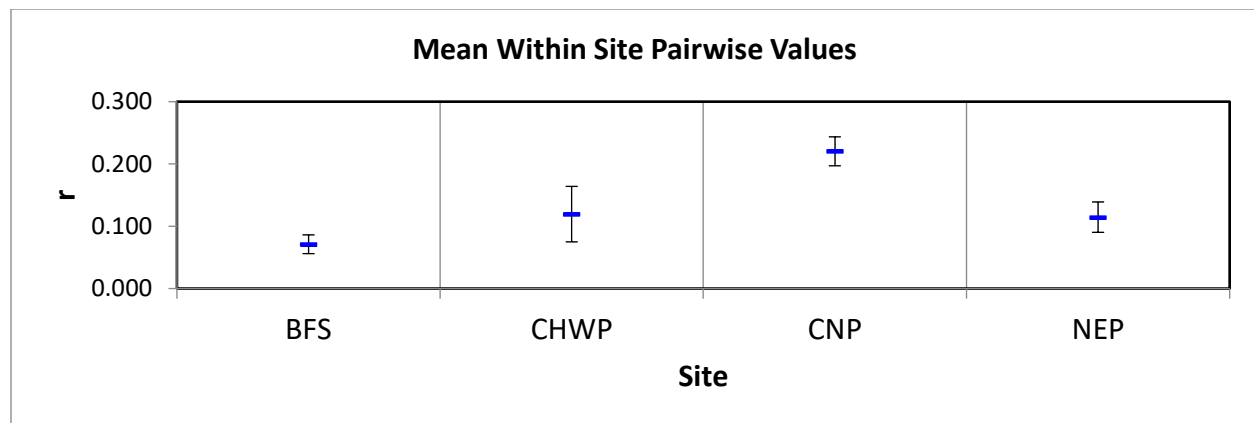

**Figure S2. Mean within-site pairwise relatedness.** Mean pairwise relatedness of coyotes (Lynch & Ritland estimator) within the four sites. The ranges of values come from 9,999 random permutations and 10,000 bootstraps in GenAlEx [31]. (Peakall and Smouse 2006, 2012). All mean estimates are greater than zero ( $p < 0.0001$ ).
